# Supplementary material for: The RNA-binding protein ILF3 binds to transposable element sequences in SINEUP lncRNAs
Source: PubMed Central journal article supplement (PMC6894054; doi:10.1096/fj.201901618rr), 2019-10-25

### **Supplementary Figure 1. Overview of the RIDome technology platform.**

**A)** The RIDome workflow consists of three key steps: (1) *Selection of interacting ORFs on a target RNA*. Displaying phages are challenged with a biotinylated RNA bait through two cycles of selection and amplification. (2) *Sequencing of the selected inserts and ranking of reads*. ORF inserts are recovered from the selected libraries, sequenced by NGS, ranked and scored according to their frequency. (3) *Recovery and validation of the top ranking ORFs*. High-scoring ORFs are re-cloned from the library by inverse PCR, and their interactions are validated by ELISA or other assays.

### **Supplementary Figure 2. Single-cycle kinetics analysis of SINEUP RNA – ILF3 interaction.**

The resulting sensorgram (red line) after double-referencing (subtraction of signal from the reference surface and “zero sample concentration” control cycle), fitted according a 1:1 binding model. Black line represents the theoretical fitted curve.

### **Supplementary Figure 3. ILF3 binding analysis from ENCODE eCLIP data in human K562 cells.**

**(A)** SINEs class is the most frequent and enriched class of repeats in overlap with ILF3 peaks. **(B)** The same analysis is carried out on SINEs families (pink) and subfamilies (cyan). Enrichments are measured with respect to the genomic average resulting from randomizations and are appreciable on the Y axes. Larger class/families/subfamilies are on the right. Enrichments are shown as values above zero while depletions are below. **(C)** The numbers of peaks in SINE-containing exons are displayed according to different classes of coding and non-coding exons. **(D)** Organization of the S/AS pair associated to the coding gene UGDH whose antisense contains an embedded inverted AluJb element bound by ILF3 from the eCLIP data. **(E)** Genomic organization of the UGDH locus (Chr4:39,497,200-39,595,745) from the Ensembl genome browser. The track showing mapping of SINEs is in grey whereas ILF3 peaks, loaded as custom track, are in black.

**Supplementary Figure 4. ILF3 expression and knocked-down in HEK 293T/17.** **(A)** Endogenous ILF3 nuclear localization was assessed by immunofluorescence with anti-DRBP76 (ILF3) antibody in HEK 293T/17 while DJ-1 immunostaining was carried out as control for a non-nuclear enriched protein. **(B)** Endogenous ILF3 was silenced with target specific siRNA and control siRNA in HEK 293T/17.

A

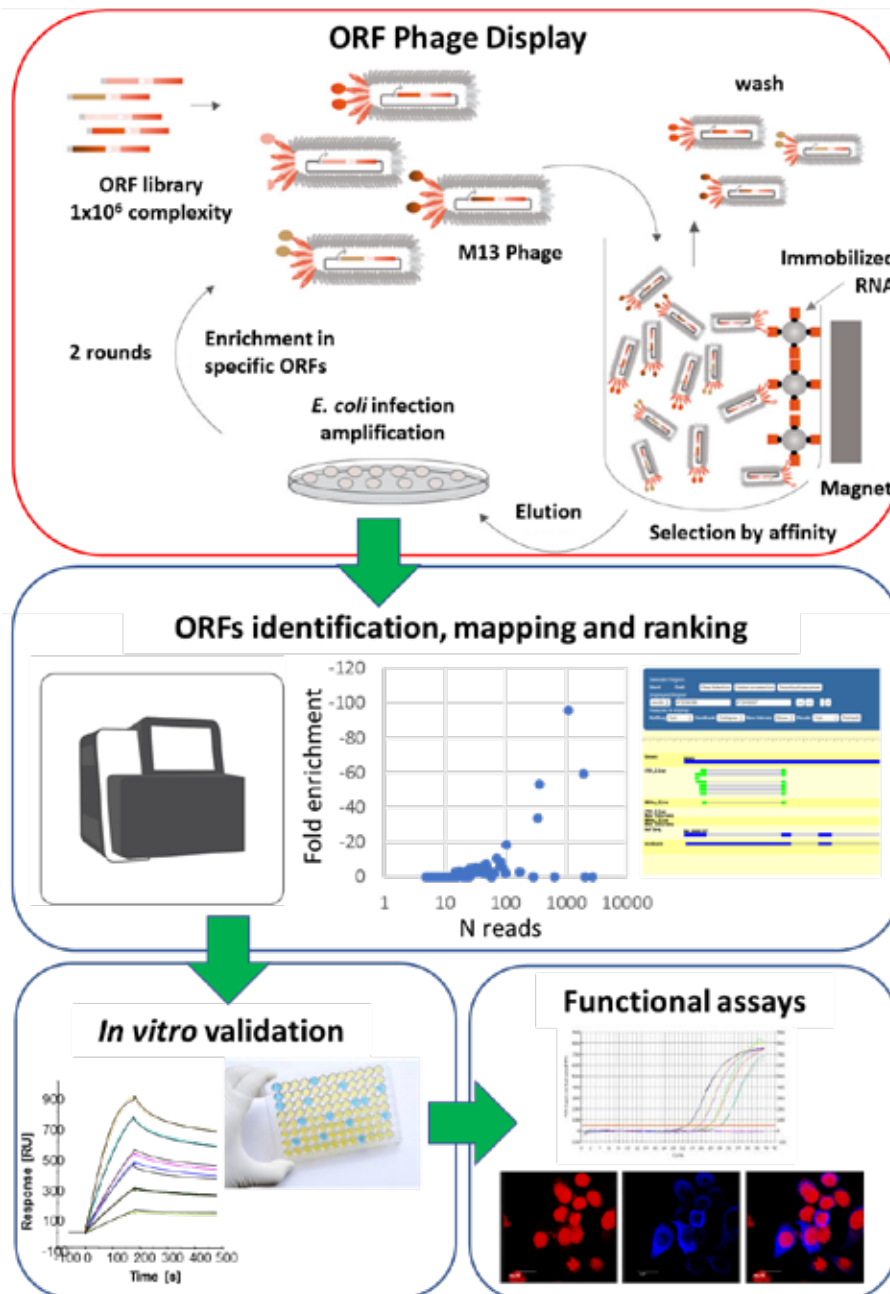

A

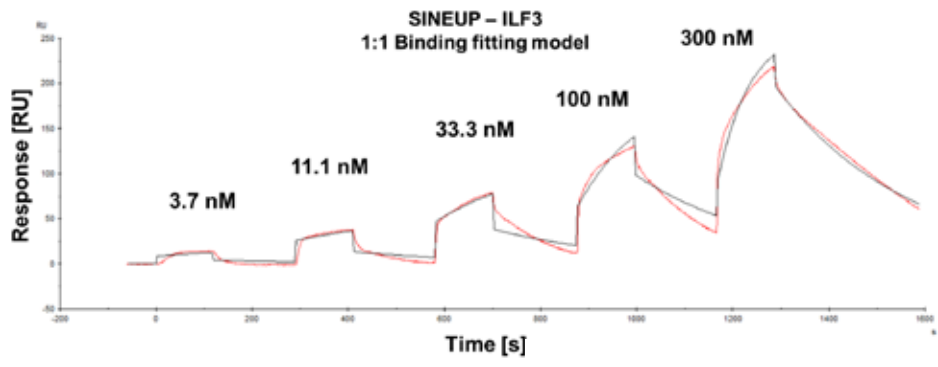

Supplementary Figure 3

A

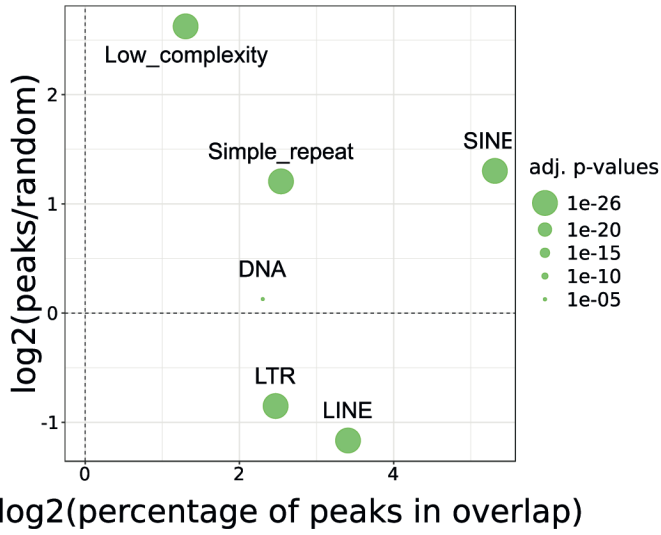

B

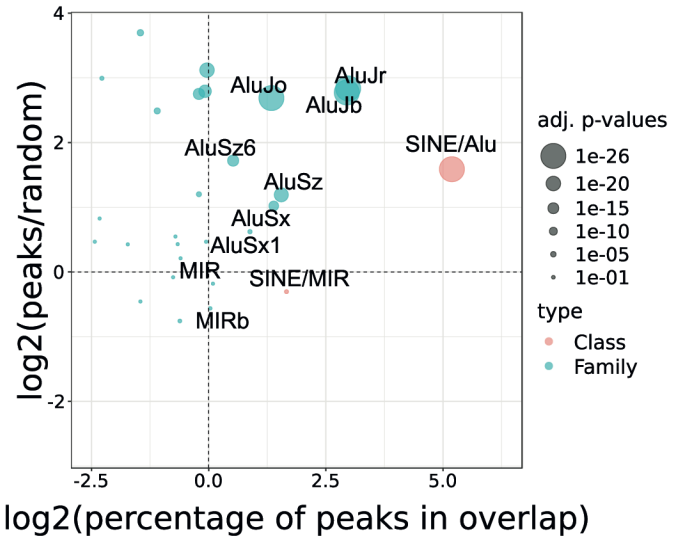

C

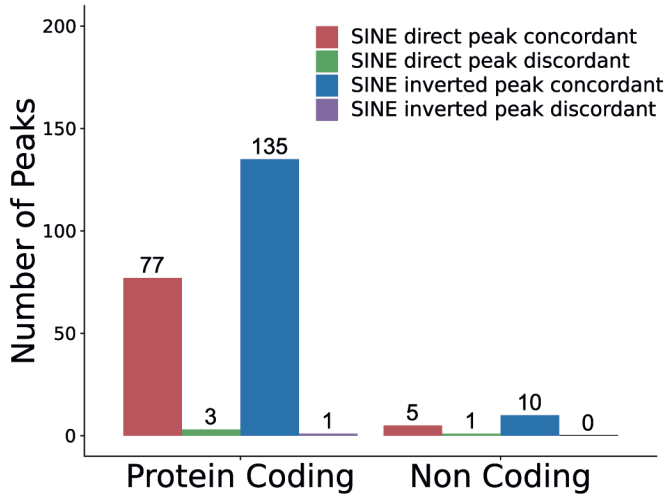

D

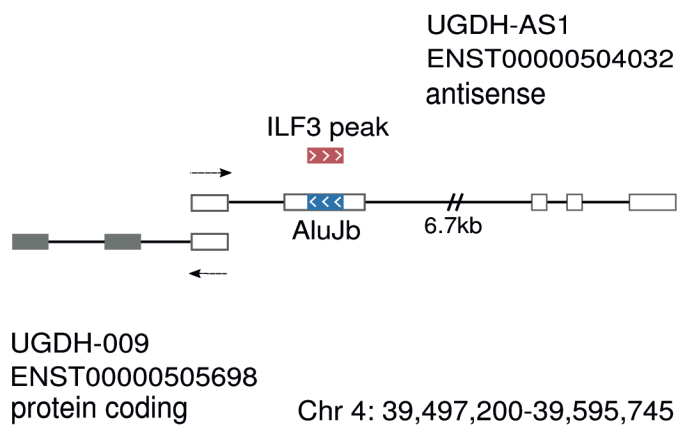

E

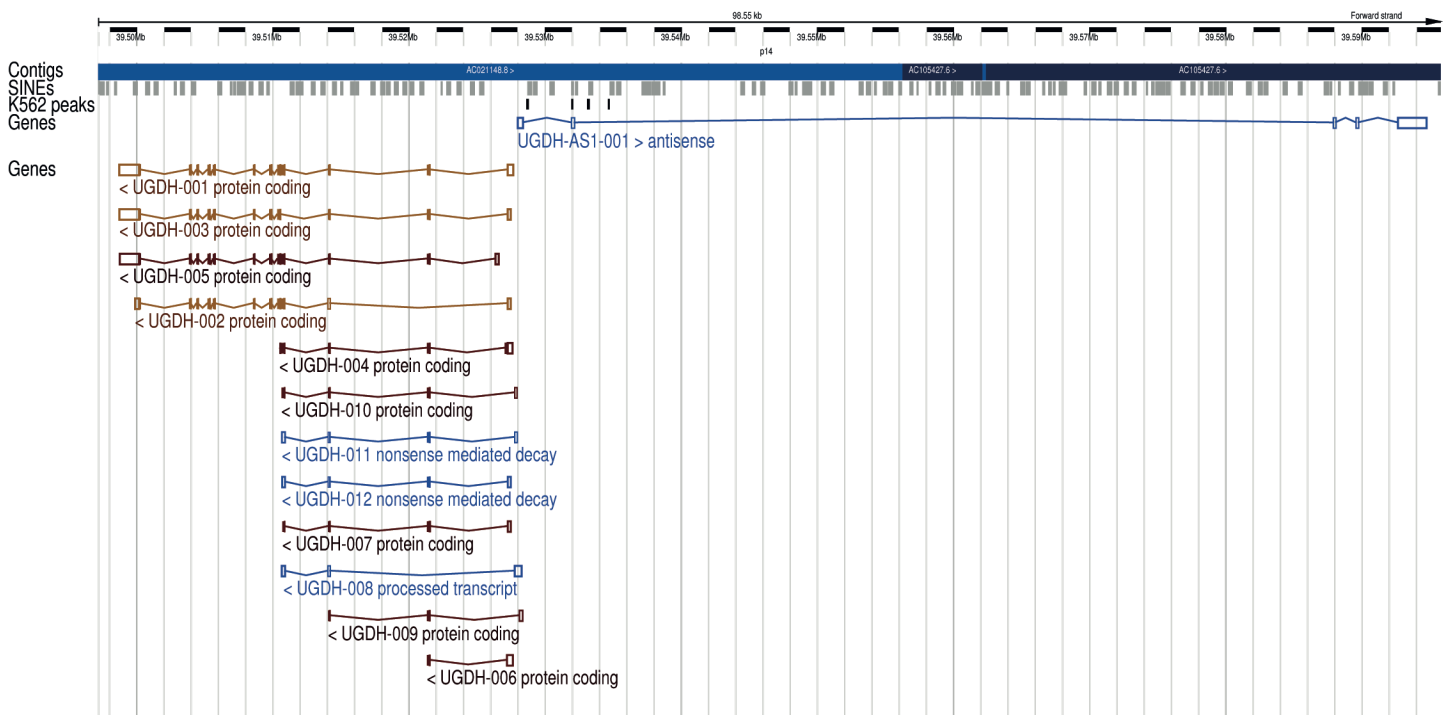

Supplementary Figure 4

A

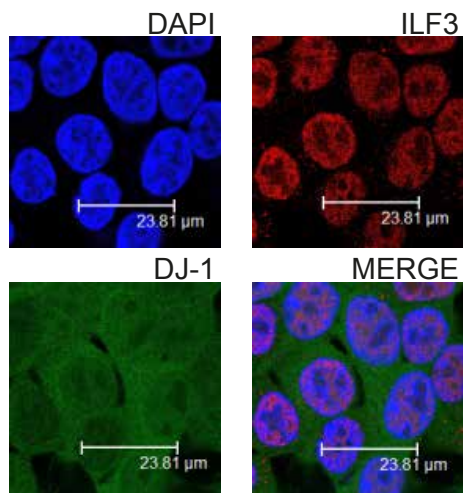

B

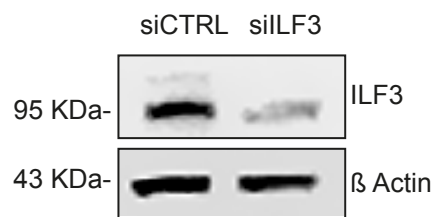

Supplement: fj.201901618RR.sd1.pdf [file fj.201901618RR.sd1.pdf]
